# Supplementary material for: Prognostic Prediction of Cytogenetically Normal Acute Myeloid Leukemia Based on a Gene Expression Model
Source: Front Oncol. 2021 May 27;11:659201. doi: 10.3389/fonc.2021.659201 (PMC8190396; doi:10.3389/fonc.2021.659201)
Supplement: Supplementary file 5 [file Table_4.xlsx]

## Sheet: step10.unicox_for_clinic_dat
Table S4. Univariate Cox analysis for independent risk factors
Factors	Beta	HR	Lower	Upper	Wald.test	P.value
RiskScore	0.06	1.06	1.04	1.09	34.08	0
Sex	0.2	1.22	0.64	2.31	0.36	0.55
Age	0.05	1.05	1.02	1.08	12.15	0
Basophils_in_PB	0.19	1.21	0.53	2.73	0.2	0.65
Blasts_in_BM	0	1	0.98	1.01	0.35	0.55
Blasts_in_PB	0	1	0.99	1.02	0.47	0.49
Eosinophils_in_PB	-0.07	0.94	0.69	1.28	0.17	0.68
Immature_Granulocytes	0.04	1.04	0.95	1.13	0.63	0.43
Lymphocytes_in_PB	0.01	1.01	0.99	1.02	0.57	0.45
Monocytes_in_PB	0	1	0.98	1.02	0	0.97
Neutrophils_in_PB	0	1	0.98	1.03	0.16	0.69
LDH	0	1	1	1	1.78	0.18
MCV	0	1	0.95	1.06	0.01	0.94
Platelet_Count	0	1	0.99	1	0.68	0.41
WBC_Count	0	1	1	1.01	0.07	0.8
ACAN_mut	-17.05	0	0	Inf	0	1
ASXL1_mut	0.66	1.93	0.59	6.32	1.19	0.27
BCOR_mut	0.68	1.97	0.76	5.1	1.96	0.16
CBL_mut	0.07	1.07	0.15	7.83	0	0.95
CEBPA_mut	-17.07	0	0	Inf	0	1
CSF3R_mut	-17.05	0	0	Inf	0	1
CTCF_mut	-0.14	0.87	0.12	6.34	0.02	0.89
DNMT3A_mut	-0.22	0.8	0.39	1.64	0.36	0.55
FLT3_ITD	0.66	1.93	0.98	3.78	3.64	0.06
FLT3_TKD	-0.12	0.89	0.27	2.93	0.04	0.84
GATA2_mut	-17.1	0	0	Inf	0	1
IDH1_mut	-0.86	0.42	0.1	1.81	1.35	0.25
IDH2_mut	0.33	1.39	0.57	3.4	0.52	0.47
IMPG1_mut	-17.06	0	0	Inf	0	1
KRAS_mut	0.02	1.02	0.14	7.45	0	0.99
KRT14_mut	0.64	1.89	0.25	13.99	0.39	0.53
LOXHD1_mut	-17.12	0	0	Inf	0	1
LPIN2_mut	-16.03	0	0	Inf	0	1
NPM1_mut	-0.32	0.73	0.37	1.45	0.83	0.36
NRAS_mut	-1.17	0.31	0.07	1.29	2.58	0.11
OTOP2_mut	53.31	1.41765e+23	0	Inf	0	1
PHF6_mut	0.89	2.44	0.74	8.02	2.14	0.14
PTPN11_mut	-1.43	0.24	0.06	1.01	3.77	0.05
RAD21_mut	-17.04	0	0	Inf	0	1
RPAP1_mut	1.35	3.87	0.52	29.05	1.73	0.19
RUNX1_mut	0.4	1.5	0.71	3.17	1.11	0.29
SF3B1_mut	0.08	1.09	0.15	7.97	0.01	0.93
SMC1A_mut	-17.09	0	0	Inf	0	1
SMC3_mut	0.43	1.54	0.47	5.09	0.51	0.48
SRSF2_mut	0.54	1.71	0.64	4.53	1.16	0.28
STAG2_mut	-0.27	0.77	0.23	2.58	0.18	0.67
TET2_mut	1.05	2.85	1.07	7.59	4.37	0.04
TGFBR3_mut	-15.03	0	0	Inf	0	1
TP53_mut	1.52	4.56	1.55	13.46	7.57	0.01
U2AF1_mut	1.04	2.83	0.86	9.29	2.93	0.09
WT1_mut	0.22	1.24	0.38	4.07	0.13	0.72
ZRSR2_mut	1.93	6.91	1.5	31.84	6.15	0.01
